# Supplementary material for: The role of nonlinear mechanical properties of biomimetic hydrogels for organoid growth
Source: PubMed Central journal article supplement (PMC7612859; doi:10.1063/5.0044653), 2021-06-07
Supplement: EMS145498-supplement-Supporting_information.pdf [file EMS145498-supplement-Supporting_information.pdf]

1 **Supporting information**

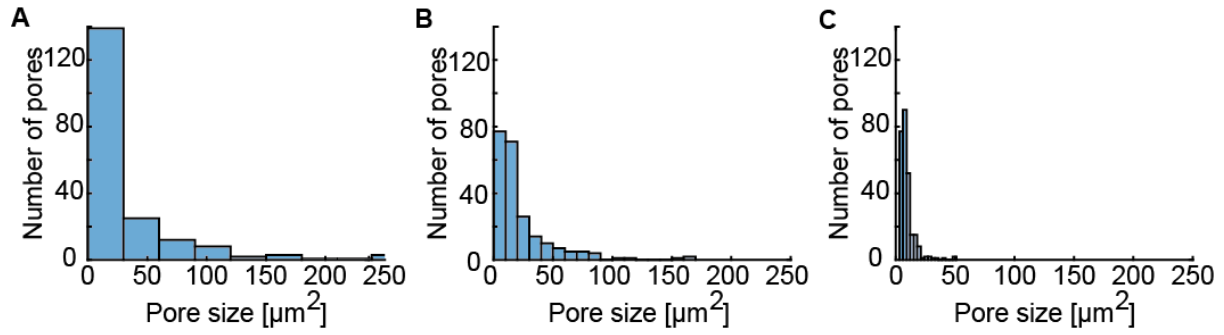

2

3 **Fig. S1 Pore size analysis.** (A-C) Pore sizes distribution for (A) pure collagen, (B) collagen  
4 enriched with 25 % Matrigel and (C) collagen enriched with 50 % Matrigel.

5

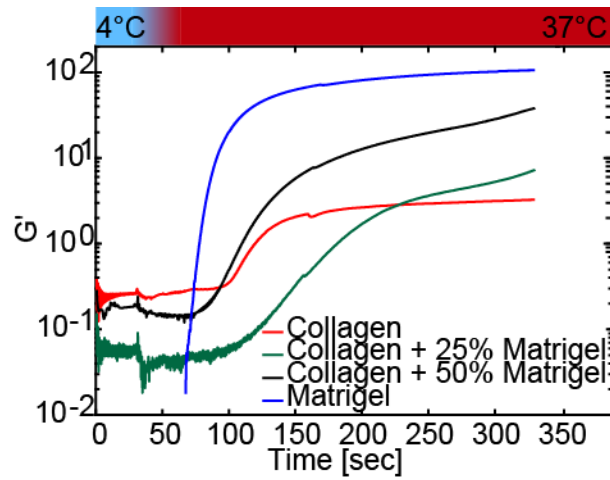

6

7 **Fig. S2 Polymerization dynamics.** Polymerization of the hydrogels is induced by heating the  
 8 samples from 4 °C to 37 °C. Hereby, the storage module of pure Matrigel and collagen  
 9 equilibrates significantly faster than in hybrid gels.

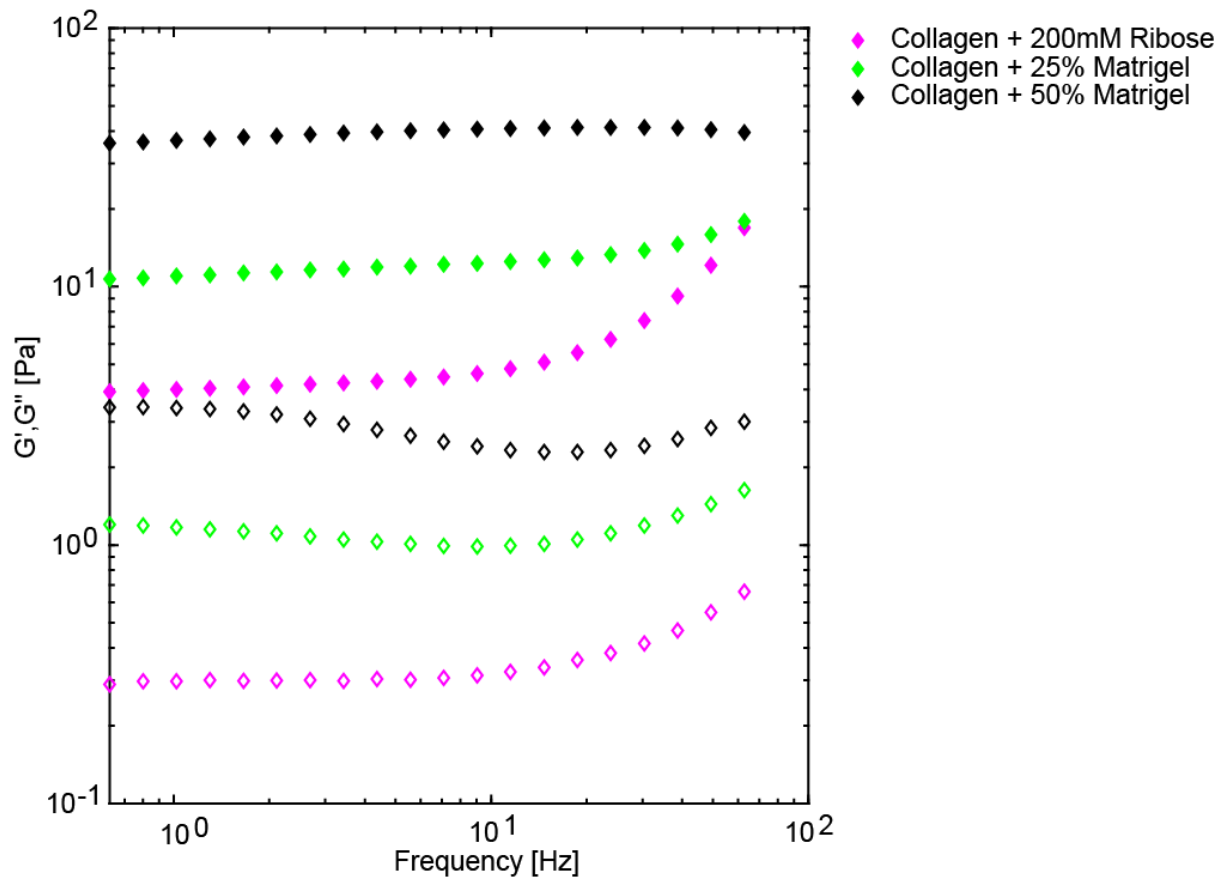

10

11 **Fig. S3 Frequency sweeps of hybrid gels.** Storage and loss module of crosslinked collagen and

12 hybrid gels of collagen and Matrigel in dependency of the frequency.

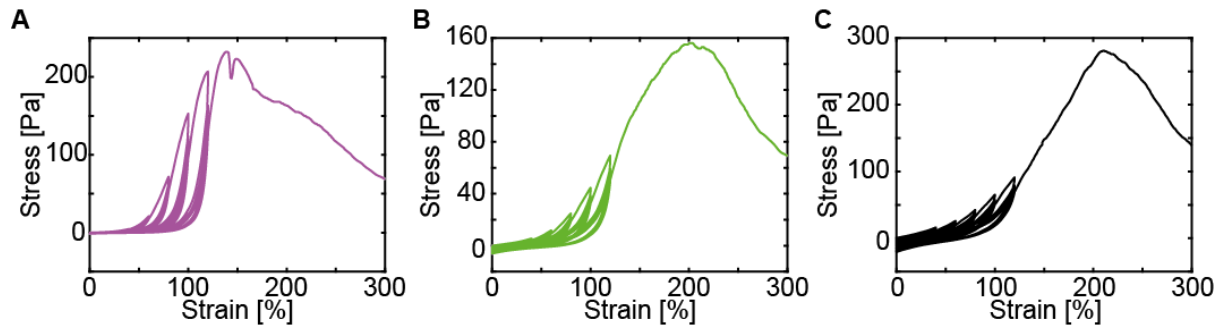

13

14 **Fig. S4 Strain-stress relation of hybrid gels.** (A-C) Representative nonlinear strain-stress relation

15 for (A) crosslinked collagen, (B) collagen enriched with 25 % Matrigel and (C) collagen enriched

16 with 50 % Matrigel.

17

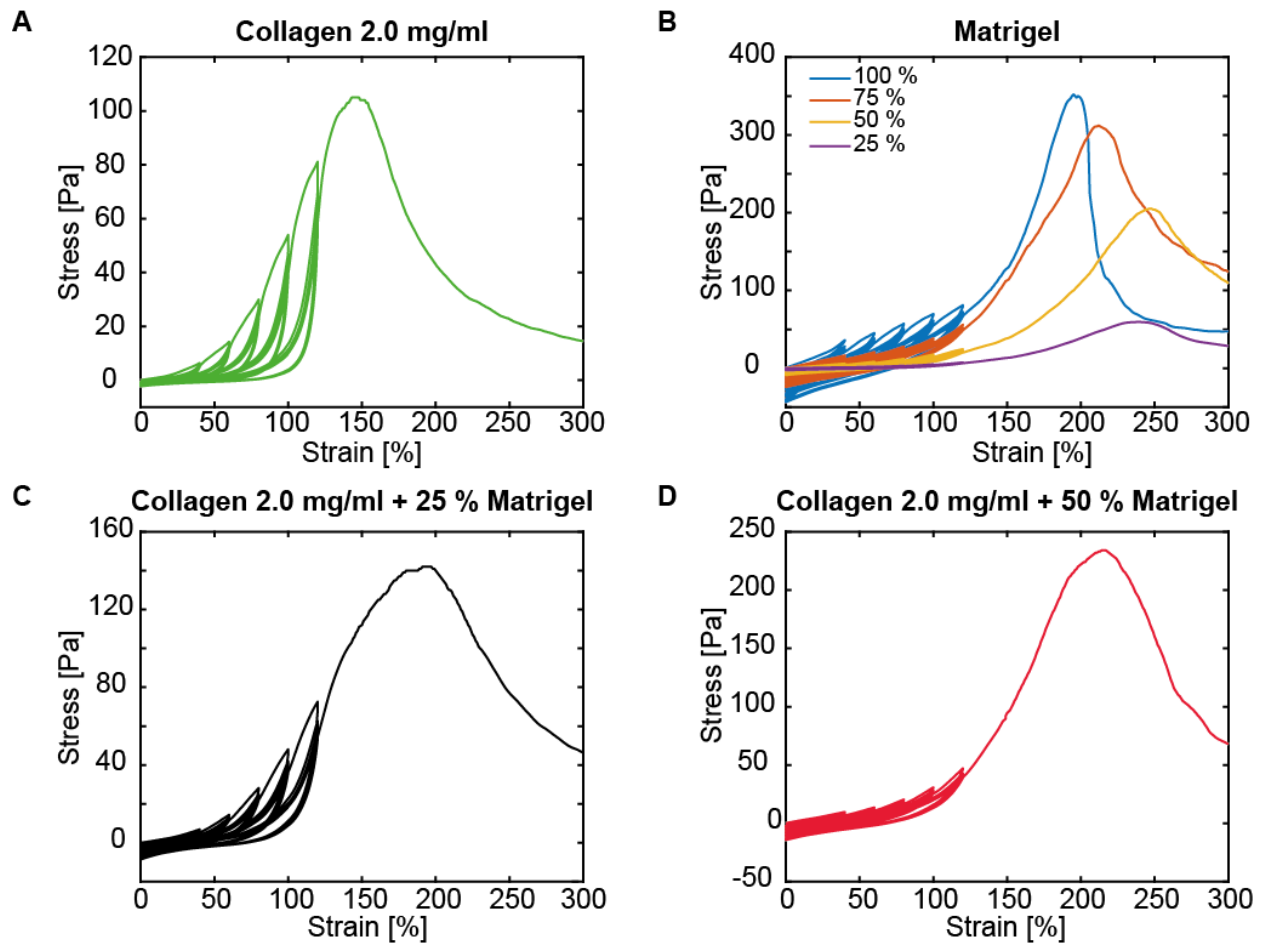

18

19 **Fig. S5 Concentration-dependent nonlinear response function.** (A) Collagen at a concentration  
 20 of 2 mg/ml exhibits the same cyclic strain-stiffening and Mullins-softening as at lower  
 21 concentrations. (B) Matrigel reveals a predominantly linear strain-stress relation independent  
 22 on the concentration. Yet, yield strain and stress changes in dependency on the concentration.  
 23 (C-D) Hybrid gels with a collagen concentration of 2 mg/ml show the same impaired nonlinear  
 24 mechanical response with increasing Matrigel concentrations similar to hybrid gels with a  
 25 collagen concentration of 1.3 mg/ml.

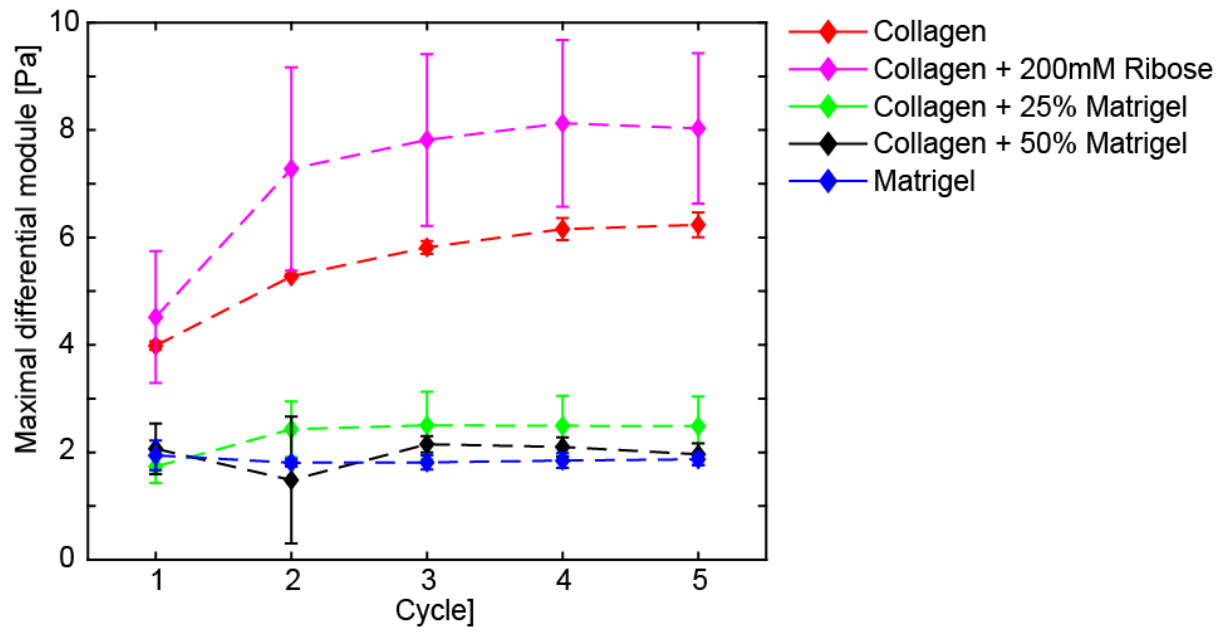

26

27 **Fig. S6 Differential module of hybrid gels.** Cycle-dependent differential module of crosslinked  
 28 collagen and hybrid gels of collagen and Matrigel at 100 % strain.

29
